# Supplementary material for: Microfluidic Microcirculation Mimetic for Exploring Biophysical Mechanisms of Chemotherapy-Induced Metastasis
Source: MDPI journal article supplement (doi:10.3390/mi14091653), 2023-08-22
Supplement: s1 [file s1]

## SUPPLEMENTARY INFORMATION

### Microfluidic Microcirculation Mimetic for Exploring Biophysical Mechanisms of Chemotherapy-Induced Metastasis

Ashley Abraham, Sukhman Viridi, Nick Herrero, Israel Bryant, Chisom Nwakama, Megha Jacob, Gargee Khaparde, Destiny Jordan, Mackenzie McCuddin, Spencer McKinley, Adam Taylor, Conner Peeples, and Andrew Ekpenyong

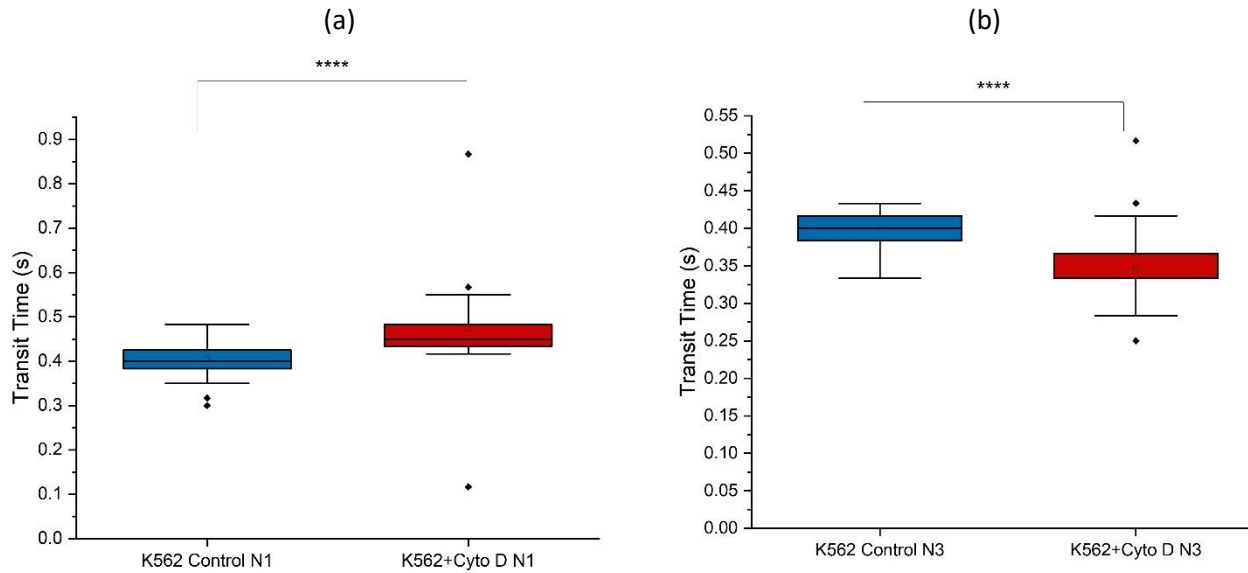

**Figure S1. Important caveats for running the MMM.** Inconsistent results may be obtained if camera frame rates become unstable. Camera frame rate, 60 fps (was unstable). MMM constriction size, 5  $\mu\text{m}$ . Flow rate, 99.9  $\mu\text{l/hr}$ . Box plots of transit times. (a) Experiment N1 shows that untreated cells (K562 Control) have significantly ( $p < 0.0001$ ) **lower** transit times than those treated with cytochalasin D (K562+CytoD). (b) Experiment N3 shows that untreated cells (K562 Control) have significantly ( $p < 0.0001$ ) **higher** transit times than those treated with cytochalasin D (K562+CytoD).
